# Supplementary material
Source: PubMed Central journal article supplement (PMC6993540)
Supplement: rcmb.2018-0373OC_evankovich_data_supplement.pdf [file rcmb.2018-0373OC_evankovich_data_supplement.pdf]

Toll-Like Receptor 8 Stability is Regulated by Ring Finger 216 in response to circulating  
MicroRNAs

John Evankovich, MD, Travis Lear, Courtney Baldwin, Yanwen Chen, Virginia White,  
John Villandre, James Londino, PhD, Yuan Liu, PhD, Bryan McVerry, Georgios D. Kitsios,  
Rama K. Mallampalli, MD, and Bill B. Chen, PhD

ONLINE DATA SUPPLEMENT

## ONLINE SUPPLEMENTARY MATERIAL

**Supplemental Figure 1:** (A) THP-1 cells were treated with mir-mimics for 2 h and immunoblotted for TLR2 or Actin. (B) TLR8 Gene expression from GEO GSE47625 analyzed by GEO2R (NCBI). NS = not significant. (C) Human PBMC's were treated with R848 (1µg/µL) for 2 h and immunoblotted for TLR8 or Actin. (D) THP-1 cells were treated for various time points with R848 (1µg/µL) and immunoblotted for TLR2 or TLR4.

**Supplemental Figure 2: (A-E)** Plasma cytokine levels from “control” or “ARDS” subjects. (F-J) Plasma cytokine levels were plotted against TLR8 OD. No significant associations were observed. All statistical analyses were performed in Graphpad.

**Supplemental Figure 3: (A-C)** RNF216 gene expression in three separate cohorts of critically ill subjects with or at risk for ARDS. Gene expression values were generated from GEO2R and plotted in Graphpad. Datasets were analyzed by Student's T test.

**Supplemental Table 1:** Demographic Characteristics of subjects with ARDS for which Nanostring miRNA array was performed.

**Supplemental Table 2:** Clinical and Demographic characteristics of subjects for which plasma samples were assayed for ability to activate TLR8.

**Supplemental Table 3:** miRNA counts above baseline from Nanostring miRNA array from n=6 ARDS subjects

**Supplemental Table 4:** RNF216 Gene expression is down-regulated in three separate gene array datasets from critically ill humans at risk or with ARDS compared to control. The table summarizes findings from three separate studies examining gene expression changes in human subjects with risk factors for or with ARDS. Gene expression data was analyzed via GEO2R (NCBI).

Supplemental Figure 1

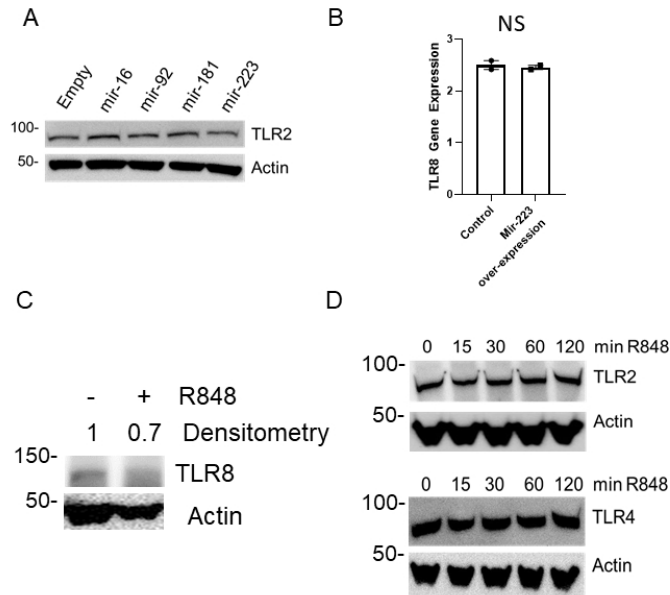

Supplemental Figure 1: (A) THP-1 cells were treated with mir-mimics for 2 h and immunoblotted for TLR2 or Actin. (B) TLR8 Gene expression from GEO GSE47625 analyzed by GEO2R (NCBI). NS = not significant. (C) Human PBMC's were treated with R848 (1 $\mu$ g/ $\mu$ L) for 2 h and immunoblotted for TLR8 or Actin. (D) THP-1 cells were treated for various time points with R848 (1 $\mu$ g/ $\mu$ L) and immunoblotted for TLR2 or TLR4.

254x190mm (96 x 96 DPI)

Supplemental Figure 2

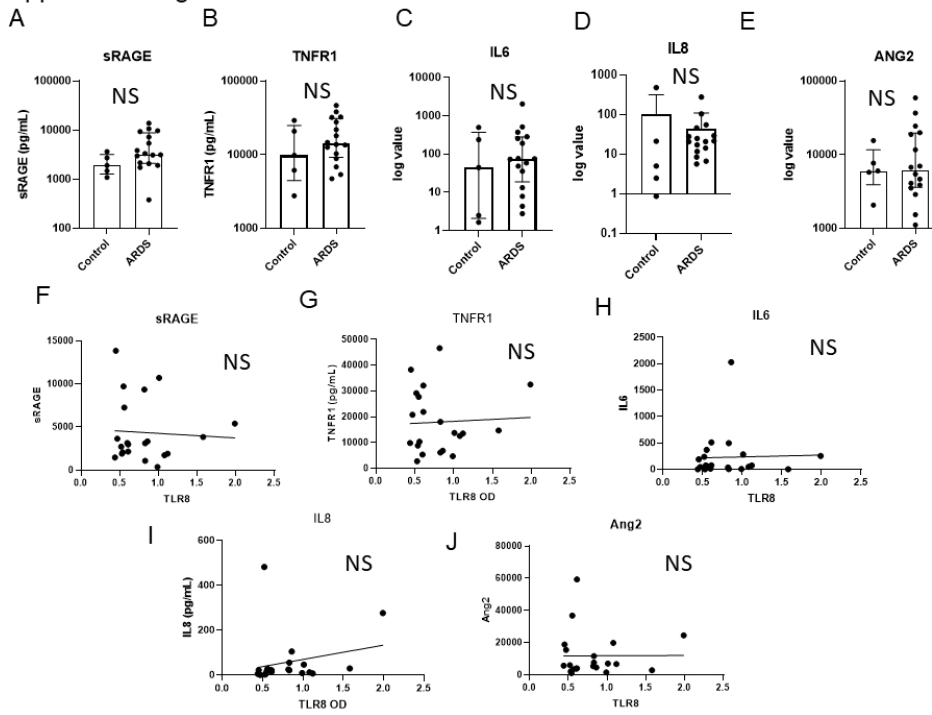

Supplemental Figure 2: (A-E) Plasma cytokine levels from "control" or "ARDS" subjects. (F-J) Plasma cytokine levels were plotted against TLR8 OD. No significant associations were observed. All statistical analyses were performed in Graphpad.

254x190mm (96 x 96 DPI)

Supplemental Figure 3

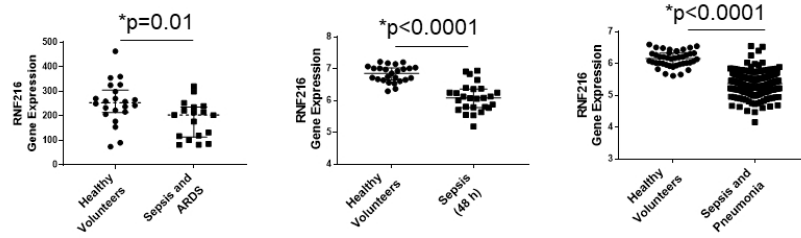

Supplemental Figure 3: (A-C) RNF216 gene expression in three separate cohorts of critically ill subjects with or at risk for ARDS. Gene expression values were generated from GEO2R and plotted in Graphpad. Datasets were analyzed by Student's T test.

254x190mm (96 x 96 DPI)

## Supplemental Table 1

| Subject | Age | Sex    | Worst P/F | Bacteremia | Primary ARDS Risk Factor |
|---------|-----|--------|-----------|------------|--------------------------|
| 1       | 35  | Female | 84        | No         | Pneumonia                |
| 2       | 55  | Male   | 80        | No         | Pneumonia                |
| 3       | 43  | Female | 68        | Yes        | Aspiration               |
| 4       | 57  | Female | 205       | Yes        | Pneumonia                |
| 5       | 25  | Male   | 248       | No         | Aspiration               |
| 6       | 50  | Male   | 76        | No         | Pancreatitis             |

Supplemental Table 1: Demographic Characteristics of subjects with ARDS for which Nanostring miRNA array was performed

**Supplemental Table 2**

| N  | Group          | Gender | Sepsis | Major ARDS Risk Factor | FiO2 | LIPS score | WBC  | ANG2     | IL-8   | IL-6    | sRAGE    | TNFR1    | TLR8 OD |
|----|----------------|--------|--------|------------------------|------|------------|------|----------|--------|---------|----------|----------|---------|
| 1  | No Lung Injury | Female | No     |                        | 40   | 5          | 16.9 | 2068.56  | 2.49   | 1.63    | 1915.49  | 2766.71  | 0.53    |
| 2  | No Lung Injury | Male   | No     |                        | 70   | 5.5        | 5.7  | 6038.74  | 481.94 | 237.89  | 2727.75  | 29202.41 | 0.52    |
| 3  | No Lung Injury | Male   | No     |                        | 40   | 5          | 18.6 | 7701.42  | 21.26  | 496.60  | 1093.74  | 6152.63  | 0.83    |
| 4  | No Lung Injury | Female | No     |                        | 40   | 3          | 5.6  | 5790.26  | 5.04   | 2.47    | 1479.15  | 9846.43  | 0.44    |
| 5  | No Lung Injury | Male   | No     |                        | 40   | 5          | 10.3 | 15582.50 | 0.87   | 44.05   | 3660.72  | 20823.89 | 0.47    |
| 6  | ARDS           | Male   | Yes    | Non-pulmonary sepsis   | 60   | 7.5        | 19.1 | 7007.29  | 46.33  | 283.46  | 10702.86 | 13789.19 | 1.01    |
| 7  | ARDS           | Female | Yes    | Pneumonia              | 80   | 5.5        | 18.4 | 3879.76  | 20.80  | 13.15   | 3158.29  | 5373.38  | 0.60    |
| 8  | ARDS           | Male   | No     | Aspiration             | 40   | 5          | 9.9  | 5459.70  | 24.95  | 35.27   | 9359.73  | 46657.36 | 0.82    |
| 9  | ARDS           | Male   | Yes    | Pneumonia              | 70   | 5.5        | 11   | 6743.92  | 6.70   | 74.14   | 1916.65  | 13563.41 | 1.12    |
| 10 | ARDS           | Male   | Yes    | Pneumonia              | 60   | 4.5        | 9.8  | 1535.24  | 8.50   | 7.79    | 381.55   | 4726.88  | 0.99    |
| 11 | ARDS           | Male   | Yes    | Pneumonia              | 60   | 5.5        | 23.2 | 1109.68  | 5.71   | 72.97   | 2083.37  | 8852.12  | 0.54    |
| 12 | ARDS           | Male   | Yes    | Non-pulmonary sepsis   | 70   | 8          | 10.6 | 19924.61 | 11.72  | 48.09   | 1745.80  | 12597.70 | 1.08    |
| 13 | ARDS           | Male   | Yes    | Non-pulmonary sepsis   | 60   | 6          | 12   | 59272.40 | 20.65  | 512.49  | 2172.63  | 32157.34 | 0.61    |
| 14 | ARDS           | Female | Yes    | Pneumonia              | 55   | 4.5        | 5.5  | 3525.94  | 27.92  | 58.24   | 7266.34  | 10346.80 | 0.56    |
| 15 | ARDS           | Male   | Yes    | Pneumonia              | 70   | 7          | 27.2 | 36852.15 | 17.23  | 370.25  | 9723.26  | 27790.12 | 0.55    |
| 16 | ARDS           | Female | No     | Surgery                | 70   | 7          | 5.9  | 11684.25 | 55.22  | 4.28    | 3125.95  | 18064.81 | 0.83    |
| 17 | ARDS           | Male   | Yes    | Aspiration             | 50   | 6.5        | 2.9  | 2887.25  | 29.37  | 2.75    | 3851.15  | 14731.38 | 1.58    |
| 18 | ARDS           | Female | Yes    | Aspiration             | 40   | 9.5        | 11.4 | 18877.52 | 21.57  | 190.35  | 13842.95 | 38298.61 | 0.45    |
| 19 | ARDS           | Female | Yes    | Aspiration             | 60   | 7          | 7.8  | 24539.81 | 276.43 | 254.51  | 5407.04  | 32573.09 | 1.99    |
| 20 | ARDS           | Female | Yes    | Non-pulmonary sepsis   | 70   | 8.5        | 12.8 | 4090.03  | 14.25  | 76.34   | 2998.40  | 21949.54 | 0.61    |
| 21 | ARDS           | Female | Yes    | Pneumonia              | 80   | 4.5        | 10   | 4660.93  | 104.57 | 2030.03 | 3338.47  | 6848.86  | 0.86    |

Supplemental Table 2: Clinical and Demographic characteristics of subjects for which plasma samples were assayed for ability to activate TLR8.

254x190mm (96 x 96 DPI)

**Supplemental Table 3**

| Name                            | Average Counts (n=6) |                 |      |
|---------------------------------|----------------------|-----------------|------|
| hsa-miR-223-3p                  | 1095.1               | hsa-miR-411-5p  | 36.7 |
| hsa-miR-4454+hsa-miR-7975       | 1073.7               | hsa-miR-486-3p  | 36.4 |
| hsa-miR-320e                    | 347.4                | hsa-miR-378h    | 36.3 |
| hsa-miR-16-5p                   | 310.4                | hsa-miR-212-3p  | 36.2 |
| hsa-let-7b-5p                   | 237.9                | hsa-miR-4455    | 35.9 |
| hsa-miR-23a-3p                  | 233.3                | hsa-miR-122-5p  | 35.8 |
| hsa-miR-126-3p                  | 209.0                | hsa-miR-144-3p  | 35.3 |
| hsa-miR-423-5p                  | 150.3                | hsa-miR-1290    | 35.1 |
| hsa-let-7a-5p                   | 123.1                | hsa-miR-22-3p   | 34.7 |
| hsa-miR-191-5p                  | 122.1                | hsa-miR-556-5p  | 34.3 |
| hsa-miR-574-5p                  | 115.5                | hsa-miR-19b-3p  | 32.6 |
| hsa-miR-612                     | 95.6                 | hsa-miR-361-5p  | 32.4 |
| hsa-miR-25-3p                   | 94.4                 | hsa-miR-181a-5p | 32.4 |
| hsa-miR-21-5p                   | 88.0                 | hsa-miR-107     | 32.0 |
| hsa-miR-199a-3p+hsa-miR-199b-3p | 86.3                 | hsa-let-7c-5p   | 31.8 |
| hsa-let-7g-5p                   | 76.3                 | hsa-miR-26b-5p  | 31.7 |
| hsa-miR-4516                    | 76.1                 | hsa-miR-30d-5p  | 31.0 |
| ath-miR159a                     | 75.8                 | hsa-miR-374a-5p | 30.5 |
| hsa-miR-630                     | 70.6                 | hsa-miR-423-3p  | 29.6 |
| hsa-miR-155-5p                  | 70.3                 | hsa-miR-342-3p  | 29.5 |
| hsa-miR-93-5p                   | 68.7                 | hsa-miR-222-3p  | 28.7 |
| hsa-miR-142-3p                  | 67.4                 | hsa-miR-15a-5p  | 28.6 |
| hsa-miR-92a-3p                  | 65.2                 | hsa-miR-199a-5p | 28.1 |
| hsa-miR-150-5p                  | 64.1                 | hsa-miR-382-5p  | 28.0 |
| hsa-miR-221-3p                  | 63.6                 | hsa-miR-24-3p   | 27.9 |
| hsa-miR-15b-5p                  | 61.7                 | hsa-miR-99b-5p  | 27.9 |
| hsa-let-7d-5p                   | 61.4                 | hsa-let-7e-5p   | 27.7 |
| hsa-miR-376a-3p                 | 50.9                 | hsa-miR-27b-3p  | 27.7 |
| hsa-miR-125a-5p                 | 50.8                 | hsa-miR-498     | 27.5 |
| hsa-let-7i-5p                   | 50.5                 | hsa-miR-151a-3p | 27.5 |
| hsa-miR-197-3p                  | 50.0                 | hsa-miR-186-5p  | 27.5 |
| hsa-miR-148a-3p                 | 49.3                 | hsa-miR-29a-3p  | 27.5 |
| hsa-miR-20a-5p+hsa-miR-20b-5p   | 47.4                 | hsa-miR-34a-5p  | 27.5 |
| hsa-miR-106a-5p+hsa-miR-17-5p   | 47.2                 | hsa-miR-409-3p  | 27.5 |
| hsa-miR-130a-3p                 | 45.0                 | hsa-miR-4286    | 27.5 |
| hsa-miR-146a-5p                 | 40.7                 | hsa-miR-4532    | 27.5 |
| hsa-miR-26a-5p                  | 39.7                 | hsa-miR-485-3p  | 27.5 |
| hsa-miR-379-5p                  | 36.9                 | hsa-miR-520f-3p | 27.5 |
|                                 |                      | hsa-miR-548q    | 27.5 |

Supplemental Table 3: miRNA counts above baseline from Nanostring miRNA array from n=6 ARDS subjects

254x190mm (96 x 96 DPI)



**Supplemental Table 4**

| Control                                              | N  | Test Group                                                | N   | Relative RNF216 Gene Expression | p-value  | Source           | Dataset          |
|------------------------------------------------------|----|-----------------------------------------------------------|-----|---------------------------------|----------|------------------|------------------|
| Ventilated ICU patients without inflammatory disease | 22 | Ventilated ICU patients with sepsis and ARDS              | 18  | -1.38                           | 0.011    | Whole Blood      | Dolinay, et. al  |
| Healthy Volunteers                                   | 25 | Patients with Sepsis for 48 hours                         | 27  | -1.78                           | 3.10E-11 | Blood Leukocytes | Cazalis, et. al  |
| Healthy Volunteers                                   | 42 | ICU Patients with Sepsis and community-acquired pneumonia | 101 | -1.74                           | 8.20E-30 | Blood Leukocytes | Scicluna, et. al |

Supplemental Table 4: RNF216 Gene expression is down-regulated in three separate gene array datasets from critically ill humans at risk or with ARDS compared to control. The table summarizes findings from three separate studies examining gene expression changes in human subjects with risk factors for or with ARDS. Gene expression data was analyzed via GEO2R (NCBI).

254x190mm (96 x 96 DPI)
